# Supplementary material
Source: PubMed Central journal article supplement (PMC4394314)
Supplement: pnas.1423319112.st05.pdf [file pnas.1423319112.st05.pdf]

***E. coli:***

| Strain       | Description                                                                                                                                                                           | Reference  |
|--------------|---------------------------------------------------------------------------------------------------------------------------------------------------------------------------------------|------------|
| DH5 $\alpha$ | F <sup>-</sup> , p80 <i>lacZ</i> ΔM15 Δ( <i>lacZYA-argF</i> )U169 <i>deoR recA1 endA1 hsdR17</i> ( <i>r<sub>k</sub>-m<sub>k</sub>+ </i> )<br><i>phoA supE44 λ- thi-1 gyrA96 relA1</i> | GIBCO, BRL |
| ER2566       | F- <i>λ- fhuA2</i> [lon] <i>ompT lacZ::T7 gene1 gal sulA11</i> Δ( <i>mcrC-mrr</i> )114::IS10<br>R( <i>mcr-73::miniTn10</i> )2 R( <i>zgb-210::Tn10</i> )(Tets) <i>endA1</i> [dcm]      | (1)        |

***M. tuberculosis:***

| Strain | Description                                                                                              | Reference  |
|--------|----------------------------------------------------------------------------------------------------------|------------|
| H37Rv  | WT ATCC collection #25618                                                                                | ATCC       |
| MHD2   | Kan <sup>R</sup> ; <i>pafA::ΦMycoMarT7</i>                                                               | (2)        |
| MHD5   | Kan <sup>R</sup> ; <i>mpa::ΦMycoMarT7</i>                                                                | (2)        |
| MHD802 | Hyg <sup>R</sup> ; Δ <i>prcBA::hyg</i>                                                                   | (3)        |
| MHD827 | Hyg <sup>R</sup> ; H37Rv, pOLYG-WT ΔPP <i>prcB</i> (FLAG-GGGG-His <sub>6</sub> )A                        | This study |
| MHD828 | Hyg <sup>R</sup> ; H37Rv, pOLYG-T1A ΔPP <i>prcB</i> (FLAG-GGGG-His <sub>6</sub> )A                       | This study |
| MHD829 | Kan <sup>R</sup> , Hyg <sup>R</sup> ; MHD2, pOLYG-WT ΔPP <i>prcB</i> (FLAG-GGGG-His <sub>6</sub> )A      | This study |
| MHD830 | Kan <sup>R</sup> , Hyg <sup>R</sup> ; MHD2, pOLYG-T1A ΔPP <i>prcB</i> (FLAG-GGGG-His <sub>6</sub> )A     | This study |
| MHD831 | Kan <sup>R</sup> , Hyg <sup>R</sup> ; MHD5, pOLYG-WT ΔPP <i>prcB</i> (FLAG-GGGG-His <sub>6</sub> )A      | This study |
| MHD832 | Kan <sup>R</sup> , Hyg <sup>R</sup> ; MHD5, pOLYG-T1A ΔPP <i>prcB</i> (FLAG-GGGG-His <sub>6</sub> )A     | This study |
| MHD872 | Hyg <sup>R</sup> ; H37Rv, pOLYG-His <sub>6</sub> - <i>pafE</i>                                           | This study |
| MHD879 | Hyg <sup>R</sup> ; H37Rv, pOLYG-His <sub>6</sub> - <i>pafE</i> <sub>Y173A</sub>                          | This study |
| MHD920 | Kan <sup>R</sup> ; H37Rv, L5 <i>attB::Rv3781-Rv3783</i>                                                  | This study |
| MHD924 | Kan <sup>R</sup> , Hyg <sup>R</sup> ; MHD5, L5 <i>attB::mpa</i> <sub>L604A</sub>                         | This study |
| MHD925 | Kan <sup>R</sup> , Hyg <sup>R</sup> ; MHD5, L5 <i>attB::mpa</i> <sub>Q605A</sub>                         | This study |
| MHD926 | Kan <sup>R</sup> , Hyg <sup>R</sup> ; MHD5, L5 <i>attB::mpa</i> <sub>Q606A</sub>                         | This study |
| MHD927 | Kan <sup>R</sup> , Hyg <sup>R</sup> ; MHD5, L5 <i>attB::mpa</i> <sub>Y607A</sub>                         | This study |
| MHD928 | Kan <sup>R</sup> , Hyg <sup>R</sup> ; MHD5, L5 <i>attB::mpa</i> <sub>L608A</sub>                         | This study |
| MHD929 | Kan <sup>R</sup> , Hyg <sup>R</sup> ; MHD5, L5 <i>attB::mpa</i> <sub>ΔL608</sub>                         | This study |
| MHD930 | Kan <sup>R</sup> , Hyg <sup>R</sup> ; MHD5, L5 <i>attB::mpa</i> <sub>Q606L</sub>                         | This study |
| MHD931 | Kan <sup>R</sup> , Hyg <sup>R</sup> ; MHD5, L5 <i>attB::mpa</i> <sub>K591R</sub>                         | This study |
| MHD932 | Kan <sup>R</sup> , Hyg <sup>R</sup> ; MHD920, Δ <i>pafE::hyg</i>                                         | This study |
| MHD946 | Kan <sup>R</sup> , Strep <sup>R</sup> ; MHD920, pAJF381                                                  | This study |
| MHD947 | Kan <sup>R</sup> , Hyg <sup>R</sup> , Strep <sup>R</sup> ; MHD932, pAJF381- <i>pafE</i>                  | This study |
| MHD980 | Kan <sup>R</sup> , Hyg <sup>R</sup> , Strep <sup>R</sup> ; MHD932, pAJF381                               | This study |
| MHD981 | Kan <sup>R</sup> , Hyg <sup>R</sup> , Strep <sup>R</sup> ; MHD932, pAJF381- <i>pafE</i> <sub>Y173A</sub> | This study |

## Plasmids:

| Plasmid                                                    | Description                                                                                                                                                                              | Reference                         |
|------------------------------------------------------------|------------------------------------------------------------------------------------------------------------------------------------------------------------------------------------------|-----------------------------------|
| pET-24b(+)                                                 | Kan <sup>R</sup> ; For inducible production of recombinant protein in <i>E. coli</i>                                                                                                     | Novagen                           |
| pET-24b(+)-His <sub>6</sub> - <i>pafE</i>                  | Kan <sup>R</sup> ; For purification of recombinant PafE with an N-terminal, thrombin-cleavable His <sub>6</sub> -tag                                                                     | This study                        |
| pET-24b(+)-His <sub>6</sub> - <i>pafE</i> <sub>G171A</sub> | Kan <sup>R</sup> ; For purification of recombinant, mutated PafE with an N-terminal, thrombin-cleavable His <sub>6</sub> -tag                                                            | This study                        |
| pET-24b(+)-His <sub>6</sub> - <i>pafE</i> <sub>Q172A</sub> | Kan <sup>R</sup> ; For purification of recombinant, mutated PafE with an N-terminal, thrombin-cleavable His <sub>6</sub> -tag                                                            | This study                        |
| pET-24b(+)-His <sub>6</sub> - <i>pafE</i> <sub>Y173A</sub> | Kan <sup>R</sup> ; For purification of recombinant, mutated PafE with an N-terminal, thrombin-cleavable His <sub>6</sub> -tag                                                            | This study                        |
| pET-24b(+)-His <sub>6</sub> - <i>pafE</i> <sub>L174A</sub> | Kan <sup>R</sup> ; For purification of recombinant, mutated PafE with an N-terminal, thrombin-cleavable His <sub>6</sub> -tag                                                            | This study                        |
| pET-24b(+)-His <sub>6</sub> - <i>pafE</i> <sub>ΔL174</sub> | Kan <sup>R</sup> ; For purification of recombinant, mutated PafE with an N-terminal, thrombin-cleavable His <sub>6</sub> -tag                                                            | This study                        |
| pET-32a(+)                                                 | Amp <sup>R</sup> ; For inducible production of recombinant protein in <i>E. coli</i>                                                                                                     | Novagen                           |
| pET-32a(+)-WT ΔPP <i>prcB</i> (His <sub>6</sub> )A         | Amp <sup>R</sup> ; For purification of recombinant, active, His <sub>6</sub> -tagged 20S                                                                                                 | This study                        |
| pET-32a(+)-20S <sub>OG</sub> CP                            | Amp <sup>R</sup> ; For purification of recombinant, active, His <sub>6</sub> -tagged open-gate 20S                                                                                       | This study                        |
| pET-32a(+)-HspR-GGGG-His <sub>6</sub>                      | Amp <sup>R</sup> ; For purification of recombinant His <sub>6</sub> -tagged HspR                                                                                                         | This study                        |
| pOLYG                                                      | Hyg <sup>R</sup> ; For overproduction of protein in <i>M. tuberculosis</i>                                                                                                               | (4)                               |
| pOLYG-WT ΔPP <i>prcB</i> (FLAG-GGGG-His <sub>6</sub> )A    | Hyg <sup>R</sup> ; For overproduction of active, TAP-tagged 20S in <i>M. tuberculosis</i> . Contains 200 bp of promoter region upstream of <i>pup</i>                                    | This study                        |
| pOLYG-T1A ΔPP <i>prcB</i> (FLAG-GGGG-His <sub>6</sub> )A   | Hyg <sup>R</sup> ; For overproduction of inactive, TAP-tagged 20S in <i>M. tuberculosis</i> . Contains 200 bp of promoter region upstream of <i>pup</i>                                  | This study                        |
| pOLYG-His <sub>6</sub> - <i>pafE</i>                       | Hyg <sup>R</sup> ; For overproduction of His <sub>6</sub> -tagged PafE in <i>M. tuberculosis</i> . Contains 200 bp of promoter region upstream of <i>pafE</i>                            | This study                        |
| pOLYG-His <sub>6</sub> - <i>pafE</i> <sub>Y173A</sub>      | Hyg <sup>R</sup> ; For overproduction of His <sub>6</sub> -tagged PafE <sub>Y173A</sub> in <i>M. tuberculosis</i> . Contains 200 bp of sequence upstream of <i>pafE</i>                  | This study                        |
| pMV306-kan                                                 | Kan <sup>R</sup> ; For integration into the L5 <i>attB</i> site of the <i>M. tuberculosis</i> chromosome                                                                                 | (5)                               |
| pMV306-kan-Rv3781-Rv3783                                   | Kan <sup>R</sup> ; To introduce the Rv3781-Rv3783 region into the chromosomal L5 <i>attB</i> site. Contains 200 bp of the putative promoter region upstream of Rv3779                    | This study                        |
| pMV306                                                     | Hyg <sup>R</sup> ; For integration into the L5 <i>attB</i> site of the <i>M. tuberculosis</i> chromosome                                                                                 | (5)                               |
| pMV306- <i>mpa</i> <sub>L604A</sub>                        | Hyg <sup>R</sup> ; To complement MHD5 by introducing mutated <i>mpa</i> variants into the chromosomal L5 <i>attB</i> site. Contains 200 bp of the region upstream of <i>mpa</i> .        | This study                        |
| pMV306- <i>mpa</i> <sub>G605A</sub>                        | Hyg <sup>R</sup> ; To complement MHD5 by introducing mutated <i>mpa</i> variants into the chromosomal L5 <i>attB</i> site. Contains 200 bp of the region upstream of <i>mpa</i> .        | This study                        |
| pMV306- <i>mpa</i> <sub>Q606A</sub>                        | Hyg <sup>R</sup> ; To complement MHD5 by introducing mutated <i>mpa</i> variants into the chromosomal L5 <i>attB</i> site. Contains 200 bp of the region upstream of <i>mpa</i> .        | This study                        |
| pMV306- <i>mpa</i> <sub>Y607A</sub>                        | Hyg <sup>R</sup> ; To complement MHD5 by introducing mutated <i>mpa</i> variants into the chromosomal L5 <i>attB</i> site. Contains 200 bp of the region upstream of <i>mpa</i> .        | This study                        |
| pMV306- <i>mpa</i> <sub>L608A</sub>                        | Hyg <sup>R</sup> ; To complement MHD5 by introducing mutated <i>mpa</i> variants into the chromosomal L5 <i>attB</i> site. Contains 200 bp of the region upstream of <i>mpa</i> .        | This study                        |
| pMV306- <i>mpa</i> <sub>ΔL608</sub>                        | Hyg <sup>R</sup> ; To complement MHD5 by introducing mutated <i>mpa</i> variants into the chromosomal L5 <i>attB</i> site. Contains 200 bp of the region upstream of <i>mpa</i> .        | This study                        |
| pMV306- <i>mpa</i> <sub>Q606L</sub>                        | Hyg <sup>R</sup> ; To complement MHD5 by introducing mutated <i>mpa</i> variants into the chromosomal L5 <i>attB</i> site. Contains 200 bp of the region upstream of <i>mpa</i> .        | This study                        |
| pYUB854                                                    | Hyg <sup>R</sup> ; To generate an <i>M. tuberculosis</i> mutant through double-crossover recombination                                                                                   | (6)                               |
| pYUB854-Δ <i>pafE</i> :: <i>hyg</i>                        | Hyg <sup>R</sup> ; To delete and disrupt the <i>pafE</i> gene locus with a hygromycin resistance cassette. Leaves intact the first 30 and the last 65 base pairs of the coding sequence. | This study                        |
| pAJF381                                                    | Strep <sup>R</sup> ; For integration into the Tweety <i>attB</i> site of the <i>M. tuberculosis</i> chromosome                                                                           | Allison Faye and Michael Glickman |
| pAJF381- <i>pafE</i>                                       | Strep <sup>R</sup> ; To complement MHD932 by introducing <i>pafE</i> into the chromosomal Tweety <i>attB</i> site. Contains 200 bp of promoter region upstream of Rv3779.                | This study                        |
| pAJF381- <i>pafE</i> <sub>Y173A</sub>                      | Strep <sup>R</sup> ; To complement MHD932 by introducing mutated <i>pafE</i> into the chromosomal Tweety <i>attB</i> site. Contains 200 bp of promoter region upstream of Rv3779.        | This study                        |

## Primers:

| Primer Name                          | Primer sequence                                                              |
|--------------------------------------|------------------------------------------------------------------------------|
| <i>prcB</i> Promoter HindIII F       | agAAGCTTgtagtaaggcgcatgtgg                                                   |
| <i>prcB</i> WT SOE R                 | tcagcgcgacaatggtggCcatatgtatatctccttcgccgcctcctgcttcc                        |
| <i>prcB</i> WT SOE F                 | ggaagcaggaggcggcgaaggagatatacatatgGccaccattgtcgcgctga                        |
| <i>prcB</i> T1A SOE R                | tcagcgcgacaatggtggTcatatgtatatctccttcgccgcctcctgcttcc                        |
| <i>prcB</i> T1A SOE R                | ggaagcaggaggcggcgaaggagatatacatatgAccaccattgtcgcgctga                        |
| <i>prcB</i> -TAP-NheI SOE R          | atGCTAGCtcaATGATGATGATGATGATGATGTCCTCCTCCTCCcttgtcatcgtcatccttgaatccttctcacc |
| <i>prcB</i> -NheI- <i>prcA</i> SOE F | CATCATCATCATtgaGCTAGCgaaggagatatacatatgtagtittccgtatttc                      |
| <i>prcA</i> BamHI F                  | taGGATCCgaaggagatatacatatgtagtittccgtatttc                                   |
| RBS- <i>prcA</i> OG KpnI F           | ataGGTACCctttaagaaggagatatacaatggagcaggcgatgcgcgagcgcagcgagtgg               |
| <i>prcA</i> XbaI R                   | actctagatcagccccgacgattcg                                                    |
| <i>mpa</i> promoter KpnI F           | TAGGTACCccactacgcctgtgctagg                                                  |
| <i>mpa</i> HindIII R                 | TGAAGCTTtctacaggctggtggcggattg                                               |
| thrHis- <i>pafE</i> NdeI F           | TTACATATGCATCATCATCATCATCATCTAGTACCAAGAGGTAGTGTGATTGGATTGAGTACC              |
| <i>pafE</i> HindIII R                | TATAAGCTTTTACAGGTATTGTCCGGTGC                                                |
| <i>pafE</i> promoter HindIII F       | TTAAAGCTTGGCATCCTCGGGTACTCG                                                  |
| <i>pafE</i> BamHI R                  | TATGGATCCTTACAGGTATTGTCCGGTGC                                                |
| <i>pafE</i> pYUB 5' StuI F           | tctaggcctAGTTCCTTCTATCACGATCC                                                |
| <i>pafE</i> pYUB 5' XbaI R           | tagtctagaGACGTCGTGTCGTGTCGTGCCGGTACTC                                        |
| <i>pafE</i> pYUB 3' HindIII F        | tataagcttGTGCGCTGCCGCCCGGGGTGCGCAAGTC                                        |
| <i>pafE</i> pYUB 3' XhoI R           | tatctcgagGCATAGTCGAGCCAAAACTC                                                |
| <i>pafE</i> Y173A HindIII R          | TATAAGCTTTTACAGGGCTTGTCCGGTGC                                                |
| <i>pafE</i> Y173A BamHI R            | TATGGATCCTTACAGGGCTTGTCCGGTGC                                                |
| <i>rv3779</i> promoter XbaI F        | tagtctagaACACGGTGGTCGCGACGGAATCG                                             |
| <i>rv3781</i> SOE R                  | GGATGGTGCGGATCCGACACTCGATTAGTATGGCTGGCCGGGTGACATGG                           |
| <i>rv3781</i> SOE F                  | CCATGTCACCCCGCCAGCCATACTAATCGAGTGTCCGATCCGCACCATCC                           |
| <i>rv3783</i> HindIII R              | tagaagcttCTACACCCAGTAGGGCACCCGCGCGGATAC                                      |
| <i>mpa</i> L604A HindIII R           | atcaagcttCTACAGGTACTGGCCGGCGTTGG                                             |
| <i>mpa</i> G605A HindIII R           | atcaagcttCTACAGGTACTGGCCGAGGTTGG                                             |
| <i>mpa</i> Q606A HindIII R           | atcaagcttCTACAGGTACGCGCCGAGGTTGG                                             |
| <i>mpa</i> Y607A HindIII R           | atcaagcttCTACAGGGCCTGGCCGAGGTTGG                                             |
| <i>mpa</i> L608A HindIII R           | atcaagcttCTACGCGTACTGGCCGAGGTTGG                                             |
| <i>mpa</i> ΔL608 HindIII R           | atcaagcttCTAGTACTGGCCGAGGTTGG                                                |
| <i>mpa</i> Q606L HindIII R           | atcaagcttCTACAGGTACAGGCCGAGGTTGG                                             |
| <i>mpa</i> K591R HindIII R           | atcaagcttCTACAGGTACTGGCCGAGGTTGGACTCGGTATCAATAGCCCTGCTGGCCGACGAACT<br>CCTTCC |
| <i>rv3779</i> prom SpeI F            | AGAAGTAGTACACGGTGGTCGCGACGGAATCG                                             |
| <i>pafE</i> SOE R                    | CCTTCTAGGAGTGTGTTGCTGCTCGATTAGTATGGCTGGCCGGGTGACATGG                         |
| <i>pafE</i> SOE F                    | CCATGTCACCCCGCCAGCCATACTAATCGAGCAGCAACACACTCCTAGAAGG                         |
| <i>pafE</i> KpnI R                   | TATGGTACCTTACAGGTATTGTCCGGTGC                                                |
| <i>pafE</i> Y173A KpnI R             | TATGGTACCTTACAGGGCTTGTCCGGTGC                                                |
| <i>pafE</i> T170A HindIII R          | TATAAGCTTTTACAGGTATTGTCCGGCGCCGTGGCCGTG                                      |
| <i>pafE</i> G171A HindIII R          | TATAAGCTTTTACAGGTATTGTCCGGTGGCCGTGGCCGTG                                     |
| <i>pafE</i> Q172A HindIII R          | TATAAGCTTTTACAGGTATGCTCCGGTGGCCGTGGCCGTG                                     |
| <i>pafE</i> L174A HindIII R          | TATAAGCTTTTACGCGTATTGTCCGGTGGCCGTGGCCGTG                                     |
| <i>pafE</i> ΔL174 HindIII R          | TATAAGCTTTTGTATTGTCCGGTGGCCGTGGCCGTG                                         |
